# Supplementary material for: Visible-UVC upconversion polymer films for prevention of microbial infection
Source: Royal Society of Chemistry journal article supplement (doi:10.1039/d2tb01811j), 2023-01-01
Supplement: d2tb01811j1.pdf [file d2tb01811j1.pdf]

# Visible-UVC Upconversion Polymer for Prevention of Microbial Infection

Hang Zhao<sup>a,b</sup>, Liang Zhang<sup>a,b\*</sup>, Jinsuo Lu<sup>b\*</sup>, Shouning Chai<sup>c</sup>, Jinliu Wei<sup>a</sup>, Yuning Yu<sup>a</sup>,  
Ruoyan Miao<sup>a</sup>, Lvling Zhong<sup>a</sup>

<sup>a</sup> School of Chemistry and Chemical Engineering, Xi'an University of Architecture and  
Technology, Xi'an, Shaanxi, 710055, PR China

<sup>b</sup> School of Environmental and Municipal Engineering, Xi'an University of  
Architecture and Technology, Xi'an, Shaanxi, 710055, PR China

<sup>c</sup> Department of Environmental Science and Engineering, State Key Laboratory of  
Multiphase Flow in Power Engineering, School of Energy and Power Engineering,  
Xi'an Jiaotong University, Xi'an, Shaanxi 710049, PR China

With the increase of irradiation time, the inhibition of YSO-Pr/PVA/SA on *E. coli* reached the best at 2 h. Shorter periods of light cannot meet the needs of killing bacteria, and longer exposure times do not bring more benefits.

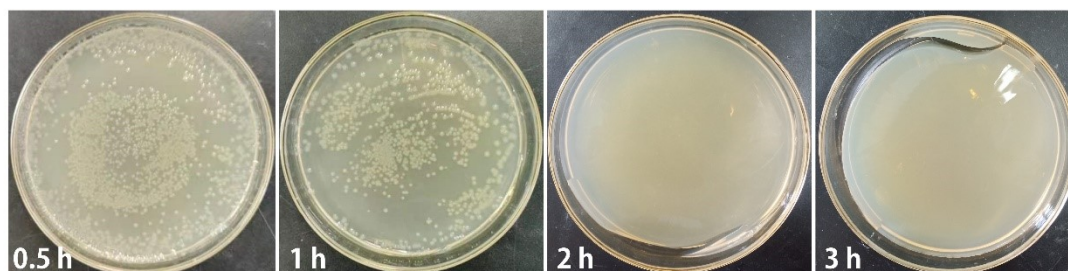

Fig. S1 Influence of irradiation time on the antibacterial effect of YSO-Pr/PVA/SA.

Bacterial inhibition tests were performed for larger bacterial concentrations (*E. coli*). The YSO-Pr/PVA/SA prepared under optimal conditions still showed good inhibition for larger concentrations of bacteria.

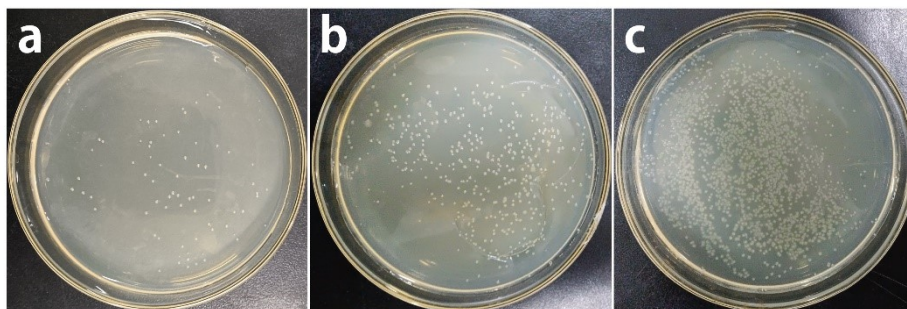

Fig. S2 Inhibition effect of YSO-Pr/PVA/SA on high concentration bacterial suspensions (*E. coli*).  
(a)  $10^8$  cfu/mL; (b)  $10^9$  cfu/mL; (c)  $10^{10}$  cfu/mL.

*In vivo* tests demonstrate the inhibitory effect of upconversion antibacterial films against pathogenic bacteria on real wounds.

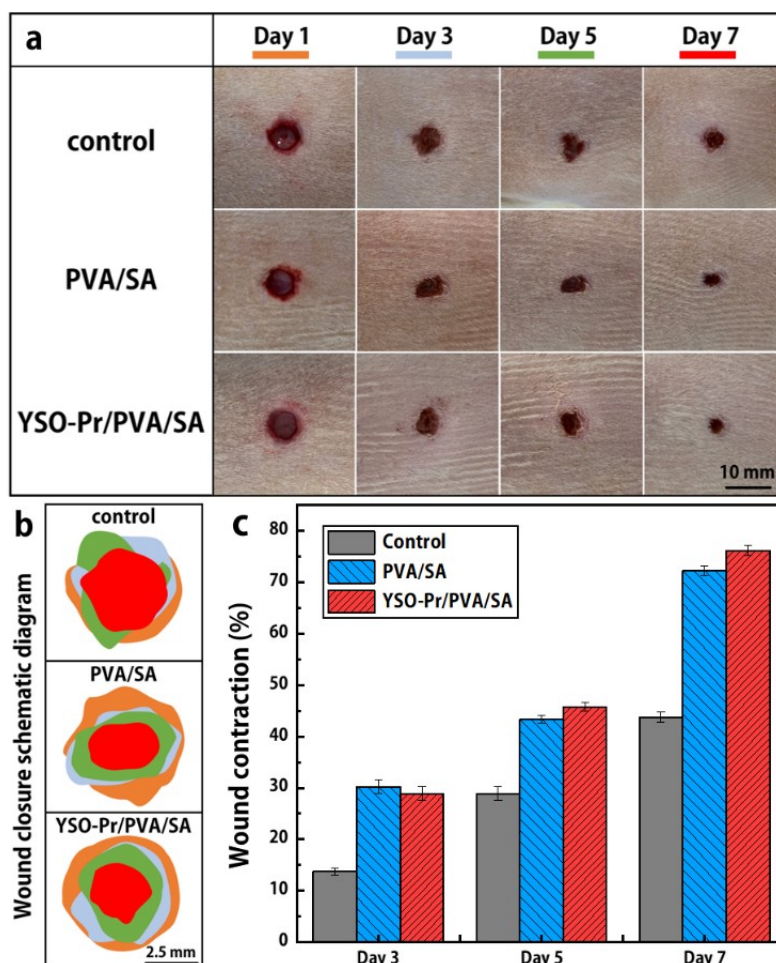

Fig. S3 (a) *In vivo* antibacterial evaluation of PVA/SA and YSO-Pr/PVA/SA simulating *S. aureus* infection; Schematic diagram of the wound closure (b) and wound contraction rate (c) on the 3rd, 5th and 7th day.
